# Supplementary material for: Efficient polymer solar cells with a solution-processed and thermal annealing-free RuO2anode buffer layer
Source: Royal Society of Chemistry journal article supplement (doi:10.1039/c3ta13680a), 2013-10-26
Supplement: c3ta13680a.pdf [file c3ta13680a.pdf]

## Supporting Information

### Efficient Polymer Solar Cells with a Solution-Processed and Thermal-annealing-free RuO<sub>2</sub> Anode Buffer Layer

Fuzhi Wang<sup>1</sup>, Qi Xu<sup>1</sup>, Zhan'ao Tan<sup>1,\*</sup>, Liangjie Li<sup>1</sup>, Shusheng Li<sup>1</sup>, Xuliang Hou<sup>1</sup>,

Gang Sun<sup>1</sup>, Xiaohe Tu<sup>1</sup>, Jianhui Hou<sup>2</sup>, Yongfang Li<sup>2,\*</sup>

Corresponding Author

\*E-mail: tanzhanao@ncepu.edu.cn (Z. A. Tan); liyf@iccas.ac.cn (Y. F. Li)

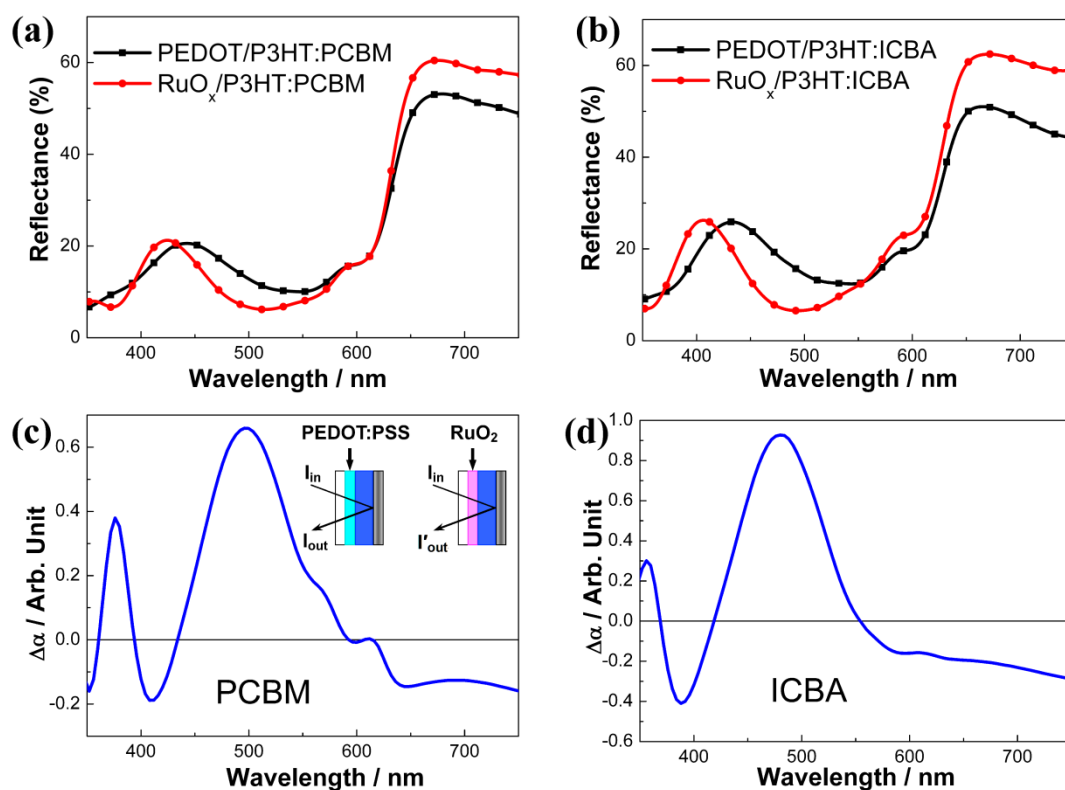

**Figure S1.** Reflectance spectra of RuO<sub>2</sub> and PEDOT:PSS modified PSCs based on (a) P3HT:PCBM, and (b) P3HT:ICBA. The change in the absorption spectrum, calculated from the reflectance spectra of PSCs based on (c) P3HT:PCBM, and (d) P3HT:ICBA.
